# Supplementary material for: Phenology and ecological role of Aerobic Anoxygenic Phototrophs in fresh waters
Source: bioRxiv preprint, doi:10.1101/2023.11.17.567504, version 1 (2023-11-17)
Supplement: Supplementary Figure S4 [file 567504_file10.pdf]

# Gemmatimonadota community

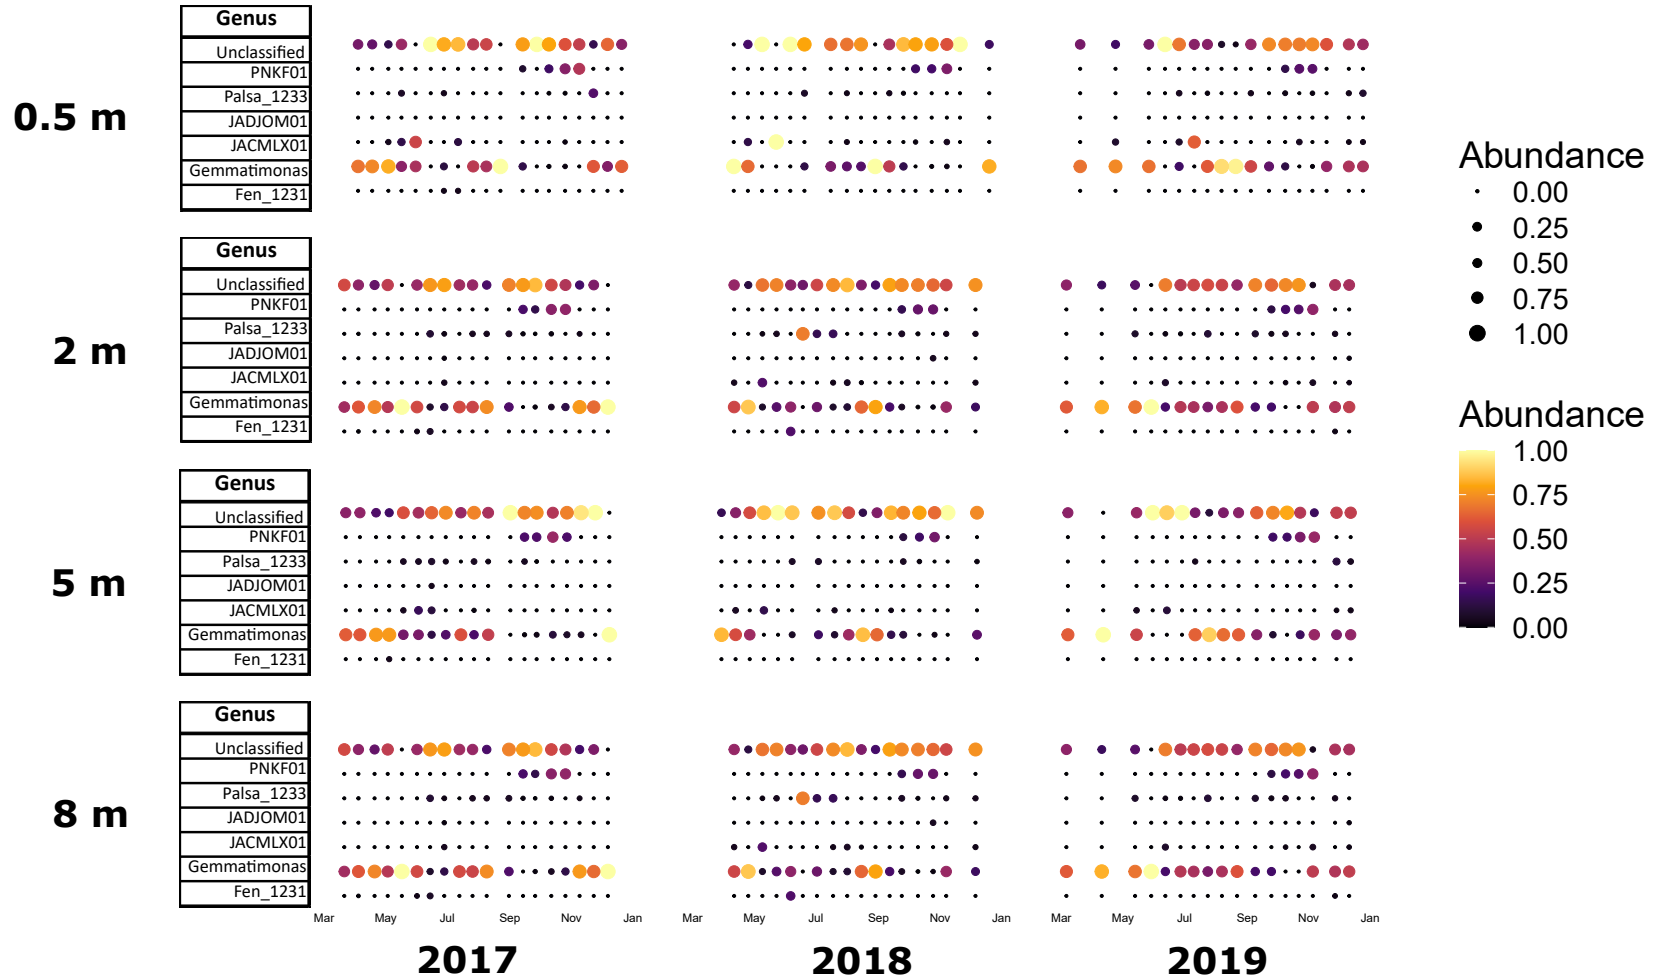

Supplementary Figure S4: Gemmatimonadota community composition at order and genus level for 3-year sampling at 0.5 (A), 2 (B), 5 (C) and 8 m depth (D). Larger size and brighter colours are directly proportional to the relative contribution of each genus to the total Gemmatimonadota community.
